# Supplementary material
Source: Springer Nature journal article supplement (https://www.springermedizin.de/resource/supplementary/12876_2012_1083_MOESM2_ESM.pdf/9438448)

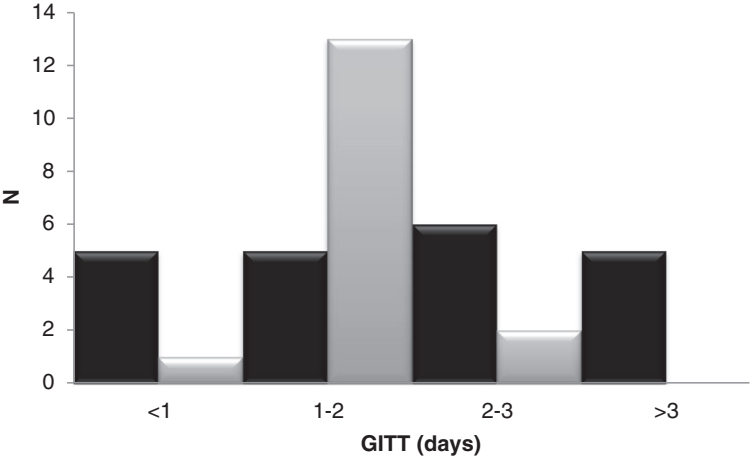

Supplement: MOESM2 [file 9438448]
